# Supplementary material for: Development of an exon skipping therapy for X-linked Alport syndrome with truncating variants in COL4A5
Source: PubMed Central journal article supplement (PMC7265383; doi:10.1038/s41467-020-16605-x), 2020-06-02
Supplement: 41467_2020_16605_MOESM1_ESM.pdf [file 41467_2020_16605_MOESM1_ESM.pdf]

## Supplementary Information

### Development of an Exon skipping therapy for X-linked Alport syndrome with truncating variants in *COL4A5*

Tomohiko Yamamura<sup>1</sup>, Tomoko Horinouchi<sup>1</sup>, Tomomi Adachi<sup>2</sup>, Maki Terakawa<sup>2</sup>, Yutaka Takaoka<sup>3</sup>, Kohei Omachi<sup>4</sup>, Minoru Takasato<sup>5</sup>, Kiyosumi Takaishi<sup>2</sup>, Takao Shoji<sup>6</sup>, Yoshiyuki Onishi<sup>6</sup>, Yoshito Kanazawa<sup>6</sup>, Makoto Koizumi<sup>6</sup>, Yasuko Tomono<sup>7</sup>, Aki Sugano<sup>3</sup>, Akemi Shono<sup>1</sup>, Shogo Minamikawa<sup>1</sup>, China Nagano<sup>1</sup>, Nana Sakakibara<sup>1</sup>, Shinya Ishiko<sup>1</sup>, Yuya Aoto<sup>1</sup>, Misato Kamura<sup>4</sup>, Yutaka Harita<sup>8</sup>, Kenichiro Miura<sup>9</sup>, Shoichiro Kanda<sup>8</sup>, Naoya Morisada<sup>1</sup>, Rini Rossanti<sup>1</sup>, Ming Juan Ye<sup>1</sup>, Yoshimi Nozu<sup>1</sup>, Masafumi Matsuo<sup>10</sup>, Hirofumi Kai<sup>4</sup>, Kazumoto Iijima<sup>1</sup> and Kandai Nozu<sup>1\*</sup>

1. Department of Pediatrics, Kobe University Graduate School of Medicine, Kobe, Japan
2. Rare Disease Laboratories, Daiichi Sankyo Co., Ltd, Shinagawa, Tokyo, Japan.
3. Division of Medical Informatics and Bioinformatics, Kobe University Hospital, Kobe, Japan
4. Department of Molecular Medicine, Graduate School of Pharmaceutical Sciences, Kumamoto University, Kumamoto, Japan
5. RIKEN Center for Developmental Biology, Kobe, Japan
6. Modality Research Laboratories, Daiichi Sankyo Co., Ltd, Shinagawa, Tokyo, Japan.
7. Division of Molecular Cell Biology, Shigei Medical Research Institute, Okayama, Japan
8. Department of Pediatrics, Graduate School of Medicine, The University of Tokyo, Tokyo, Japan
9. Department of Pediatric Nephrology, Tokyo Women's Medical University, Tokyo, Japan
10. Department of Physical Therapy, Faculty of Rehabilitation, Kobe Gakuin University, Kobe, Japan

**Supplementary Table 1 | Nucleotide numbers in each exon of the *COL4A5* gene**

|         |    |         |     |         |      |
|---------|----|---------|-----|---------|------|
| Exon 1  | 81 | Exon 18 | 42  | Exon 35 | 90   |
| Exon 2  | 60 | Exon 19 | 133 | Exon 36 | 140  |
| Exon 3  | 90 | Exon 20 | 174 | Exon 37 | 127  |
| Exon 4  | 45 | Exon 21 | 84  | Exon 38 | 81   |
| Exon 5  | 45 | Exon 22 | 93  | Exon 39 | 99   |
| Exon 6  | 63 | Exon 23 | 71  | Exon 40 | 51   |
| Exon 7  | 54 | Exon 24 | 192 | Exon 41 | 186  |
| Exon 8  | 27 | Exon 25 | 169 | Exon 42 | 134  |
| Exon 9  | 81 | Exon 26 | 93  | Exon 43 | 73   |
| Exon 10 | 63 | Exon 27 | 105 | Exon 44 | 72   |
| Exon 11 | 36 | Exon 28 | 98  | Exon 45 | 129  |
| Exon 12 | 42 | Exon 29 | 151 | Exon 46 | 99   |
| Exon 13 | 93 | Exon 30 | 114 | Exon 47 | 213  |
| Exon 14 | 54 | Exon 31 | 168 | Exon 48 | 178  |
| Exon 15 | 57 | Exon 32 | 90  | Exon 49 | 115  |
| Exon 16 | 45 | Exon 33 | 150 | Exon 50 | 173  |
| Exon 17 | 54 | Exon 34 | 99  | Exon 51 | 1249 |

Exons 1–2 and 47–51 belong to the non-collagenous domain.

Numbers in red are a multiple of three.

**Supplementary Table 2 | List of all primers in this study**

| Primer sequences for the mutagenesis in the split nanoluciferase complementation system    |          |                                 |
|--------------------------------------------------------------------------------------------|----------|---------------------------------|
| c.1350_1351delAT                                                                           | Forward: | ATGAGATGGGCTCGAGCGGTGGTGGCGGGA  |
|                                                                                            | Reverse: | TCGAGCCCATCTCATCACTAGGAGGAATGT  |
| c.1411C>T                                                                                  | Forward: | ATGAGATGGGCTCGAGCGGTGGTGGCGGGA  |
|                                                                                            | Reverse: | TCGAGCCCATCTCATCACTAGGAGGAATGT  |
| c.1340_1423del84bp                                                                         | Forward: | TCCTCCTAGTGACAAAGGTGACACTTGCTTC |
|                                                                                            | Reverse: | TTGTCACTAGGAGGAATGTGAGGGCCAGCAG |
| Primer sequences for the RT-PCR in the In vitro exon skipping efficiency evaluation by ASO |          |                                 |
| <i>COL4A5</i> cDNA primer                                                                  | Forward: | TTGCCTGGAGAAAAGGAGA             |
|                                                                                            | Reverse: | TTCTGTCCAGGGAAACCAAG            |
| Primer sequences for the RT-PCR in the In vivo (mouse) exon skipping evaluation by ASO     |          |                                 |
| <i>Col4a5</i> cDNA primer                                                                  | Forward: | GGGGCCAGAAAGGTGATGAA            |
|                                                                                            | Reverse: | AAAGCCTGGAGCACCTGGAG            |

**Supplementary Table 3 | Clinical and laboratory data about the mice studied**

|         |                              | Weight (g) |        |       |       |          |
|---------|------------------------------|------------|--------|-------|-------|----------|
|         |                              | Whole body | Kidney | Heart | Liver | Pancreas |
| Average | Wild-type<br>( <i>n</i> = 3) | 30.1       | 0.34   | 0.13  | 1.48  | 0.07     |
|         | Vehicle<br>( <i>n</i> = 6)   | 29.5       | 0.31   | 0.16  | 1.22  | 0.08     |
|         | ASO<br>( <i>n</i> = 5)       | 28.70      | 0.34   | 0.14  | 1.55  | 0.08     |
| SE      | Wild-type                    | 2.20       | 0.02   | 0.00  | 0.03  | 0.00     |
|         | Vehicle                      | 1.02       | 0.02   | 0.00  | 0.00  | 0.00     |
|         | ASO                          | 0.58       | 0.01   | 0.00  | 0.00  | 0.00     |

|         |                              | Serum laboratory data |             |                    |
|---------|------------------------------|-----------------------|-------------|--------------------|
|         |                              | Albumin (g/dL)        | BUN (mg/dL) | Creatinine (mg/dL) |
| Average | Wild-type<br>( <i>n</i> = 3) | 2.77                  | 33.00       | 0.10               |
|         | Vehicle<br>( <i>n</i> = 6)   | 2.42                  | 83.67       | 0.35               |
|         | ASO<br>( <i>n</i> = 5)       | 2.36                  | 34.20       | 0.12               |
| SE      | Wild-type                    | 0.07                  | 1.00        | 0.00               |
|         | Vehicle                      | 0.04                  | 8.32        | 0.05               |
|         | ASO                          | 0.07                  | 3.43        | 0.02               |

SE: standard errors

Source data are provided as a Source Data file.

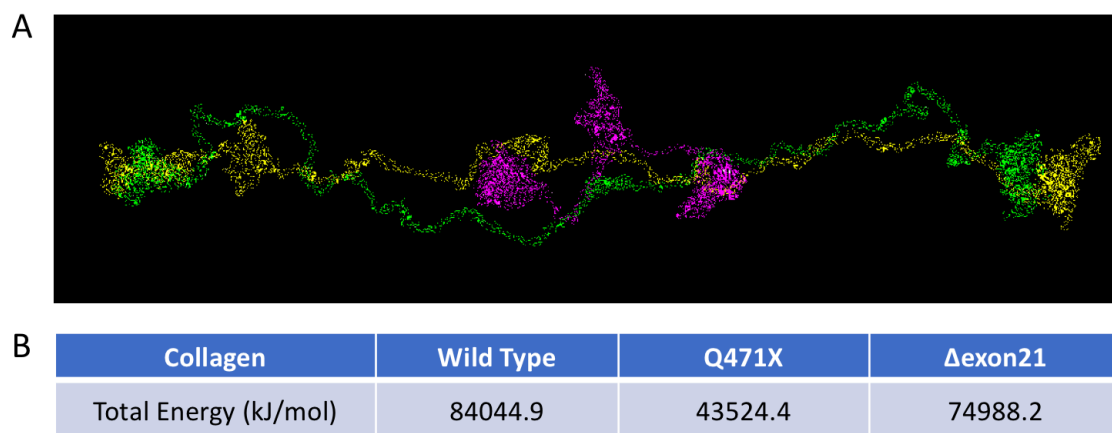

**Supplementary Fig. 1 | 3D structure of collagen IV.** **a**, 3D structure of collagen IV: Green, wild-type; yellow, p.D448\_G475del84bp mutant; Magenta, p.Gln471\* mutant. **b**, Total energy of each structure. The energy value for  $\Delta$ exon21 is closer to the wild-type value. Source data are provided as a Source Data file.

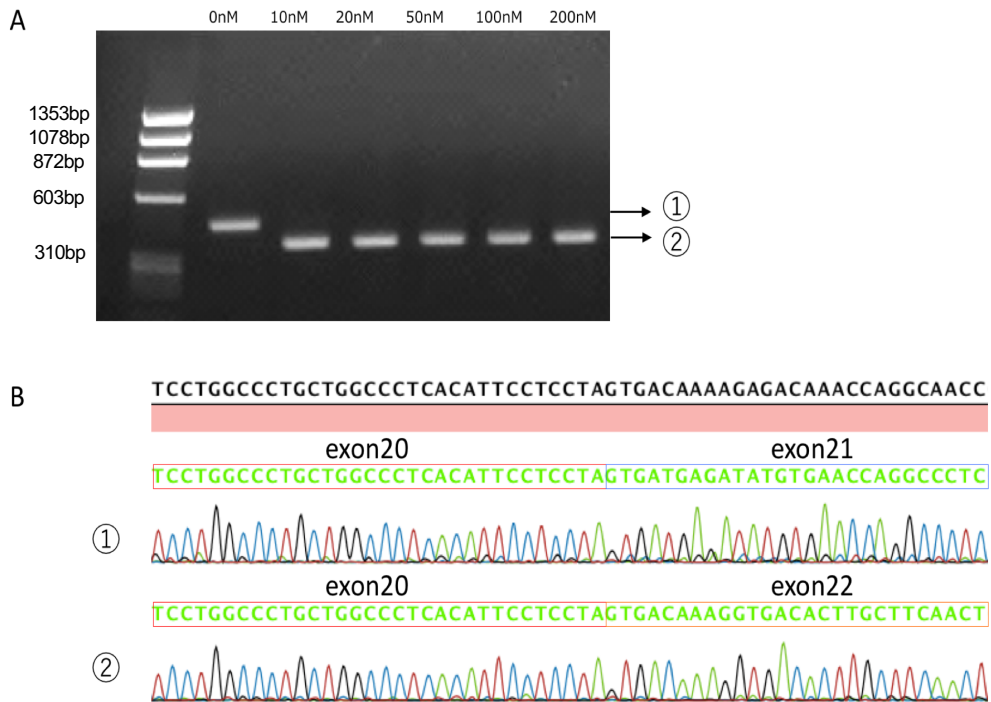

**Supplementary Fig. 2 | In vitro exon skipping efficiency evaluation by an antisense oligonucleotide (ASO).** Patient's urine derived cultured cells (p.Gln471\* in exon 21) were transfected with an ASO that targeted exon 21 (84 bp) skipping. **a**, even the lowest dose of 10 nM caused complete exon 21 skipping. **b**, The sequencing results showed that the larger band included exons 20 to 22, whereas the sequencing results of the smaller band showed that exon 20 was directly connected to exon 22. RT-PCR was conducted twice and gave identical results.

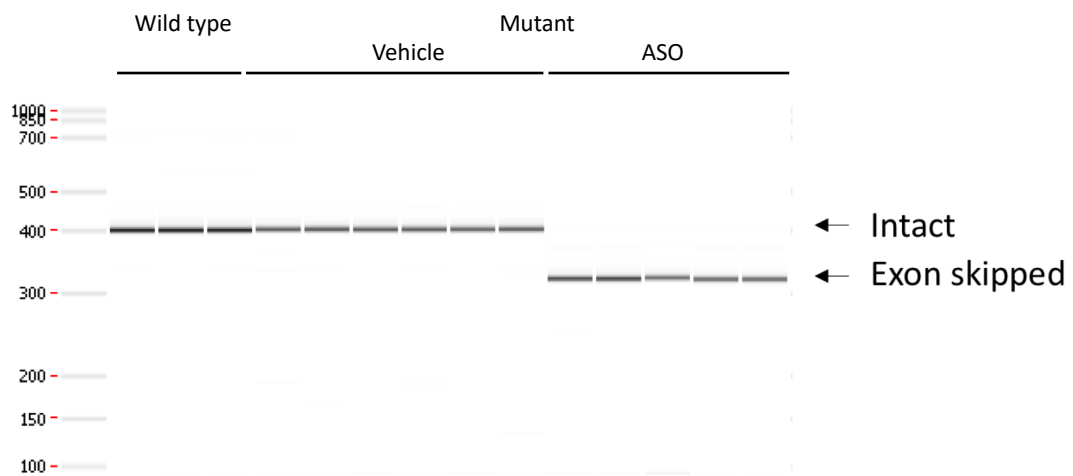

**Supplementary Fig. 3 | RT-PCR results for treated mice kidneys.** Wild-type and vehicle treated mice had larger PCR products with exon 21 present, whereas the antisense oligonucleotide (ASO) treated mice gave rise to a band that showed that exon 21 had been skipped, that is, shorter oligonucleotide product. Primer sequences are shown in Supplementary Table 2. RT-PCR was conducted once for all samples and samples in the treatment group gave an identical exon-skipped pattern as shown in this figure.

WT (saline)

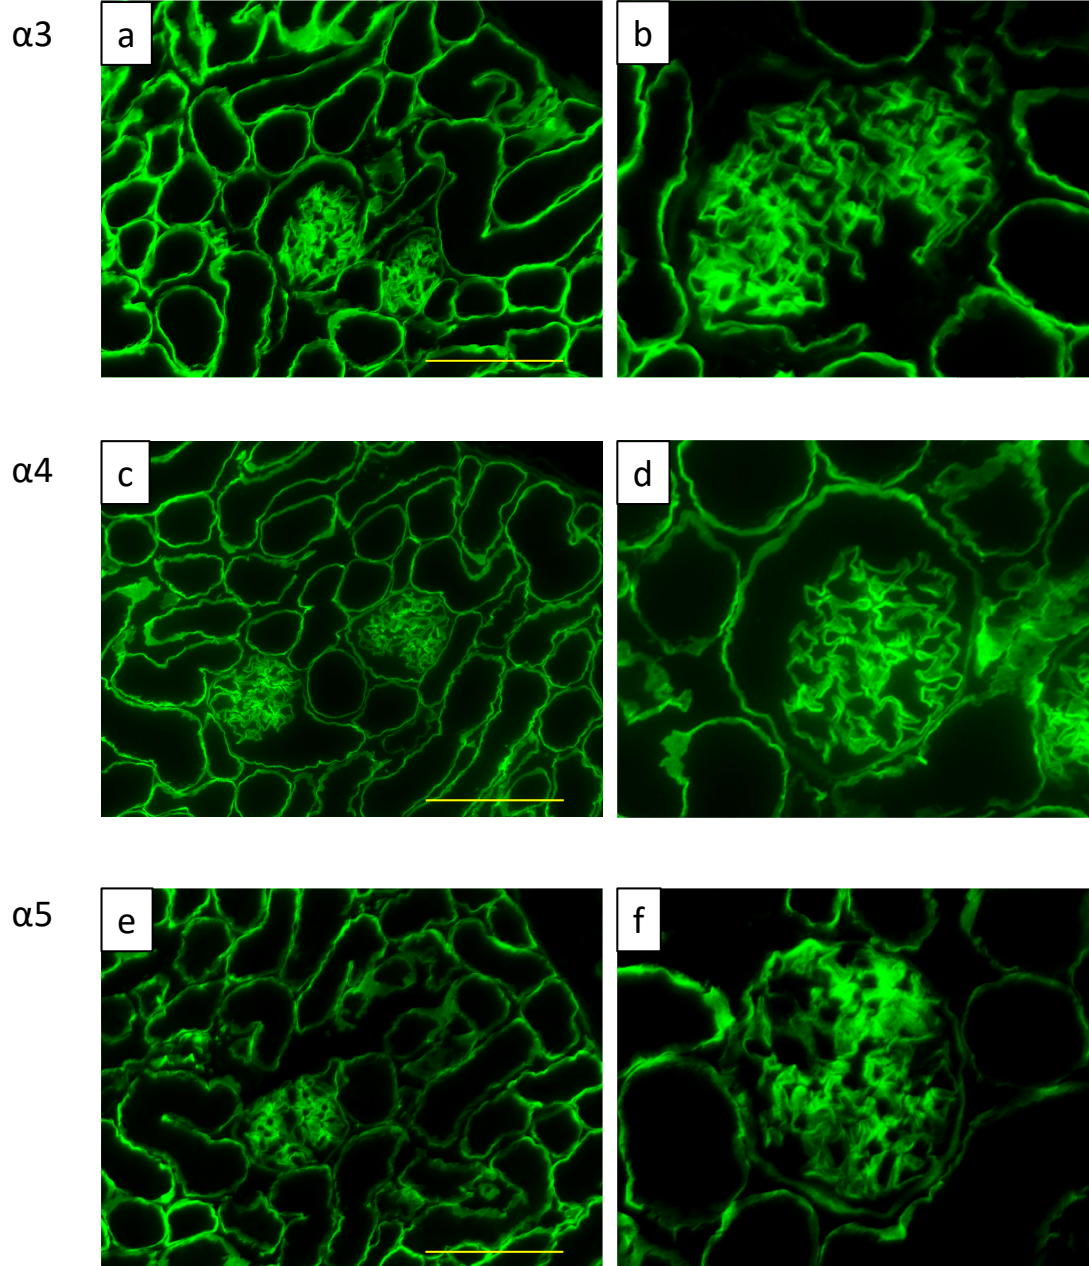



MUT (saline)

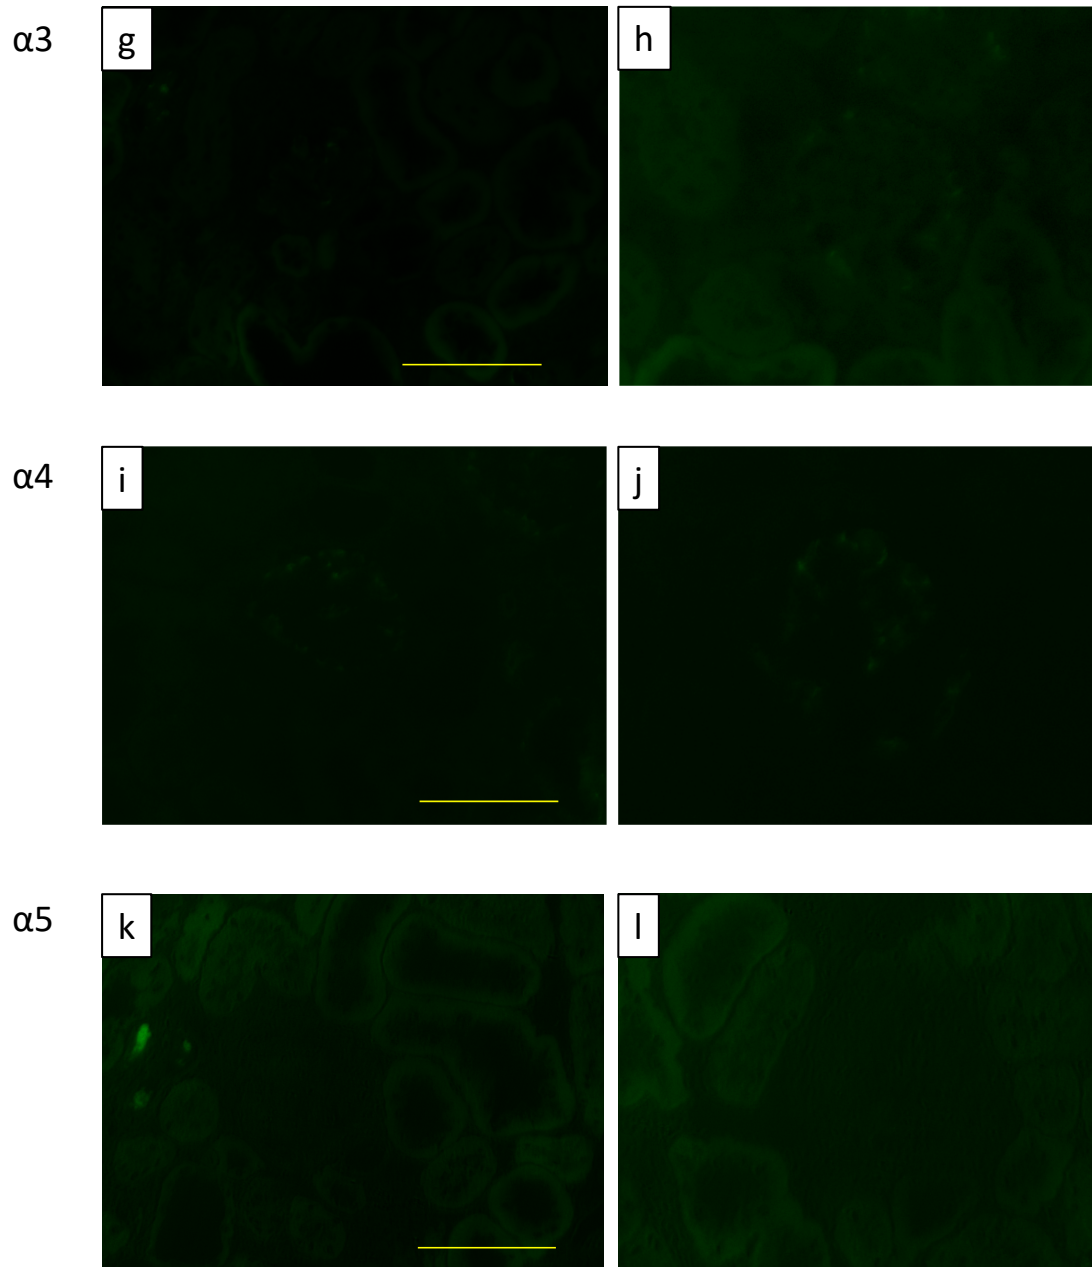

MUT (ASO)

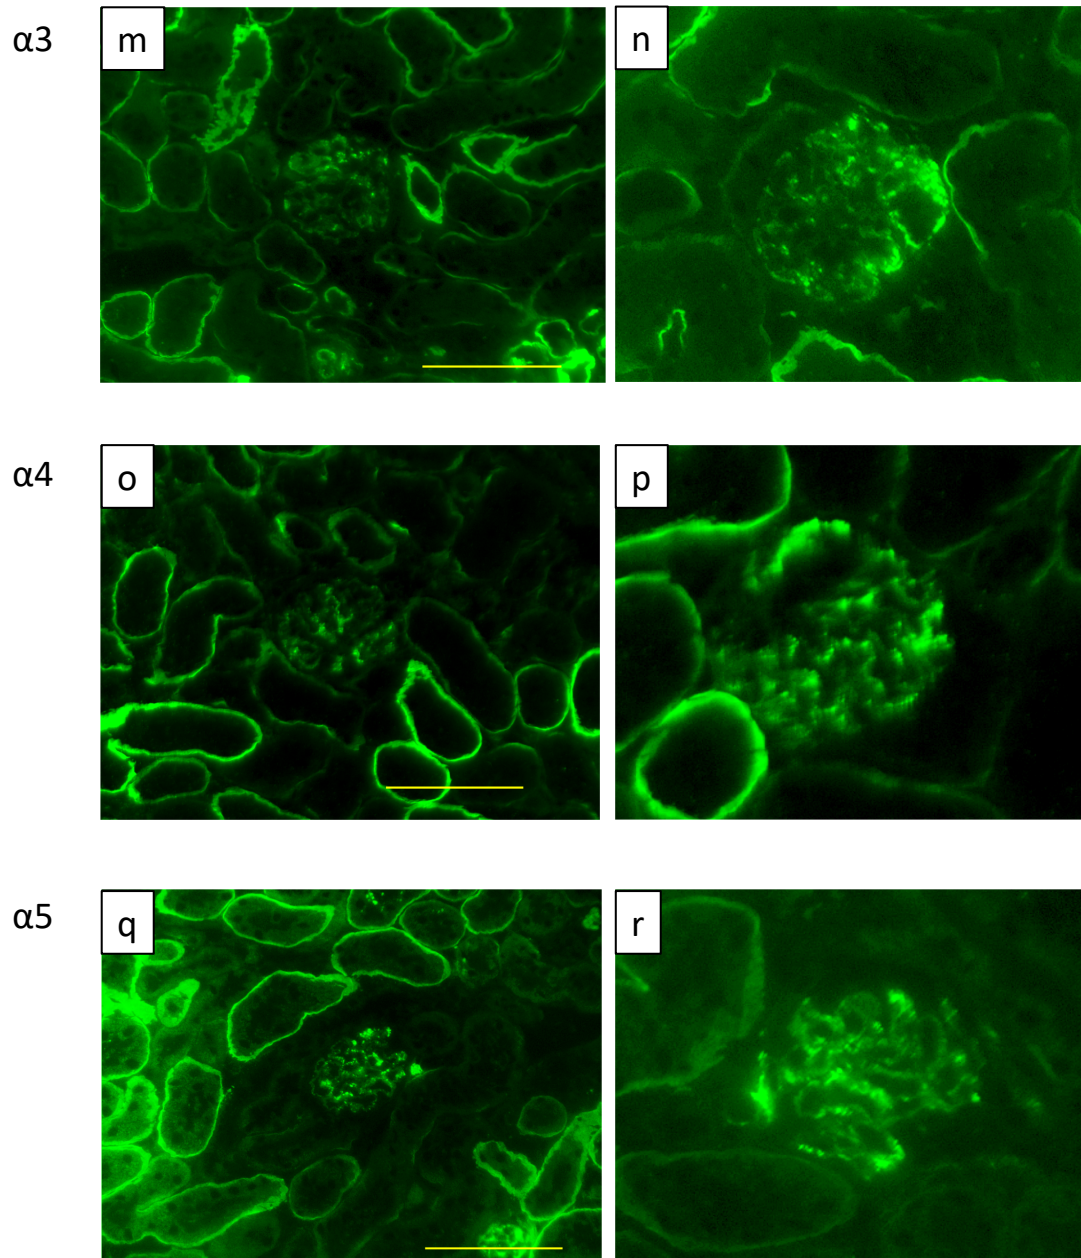

**Supplementary Fig. 4 | Type IV collagen  $\alpha 3/\alpha 4/\alpha 5$  chain staining at twenty-one weeks of age.** Green: Type IV collagen  $\alpha 3/\alpha 4/\alpha 5$  chain. Type IV collagen  $\alpha 3/\alpha 4/\alpha 5$  chain were completely negative in the vehicle group (g-l), but they were expressed on the glomerular basement membrane (GBM) in ASO-treated group (m-r). Scale bars are 100  $\mu\text{m}$ . Staining was conducted by two different researchers from different institutes and gave identical expression patterns.

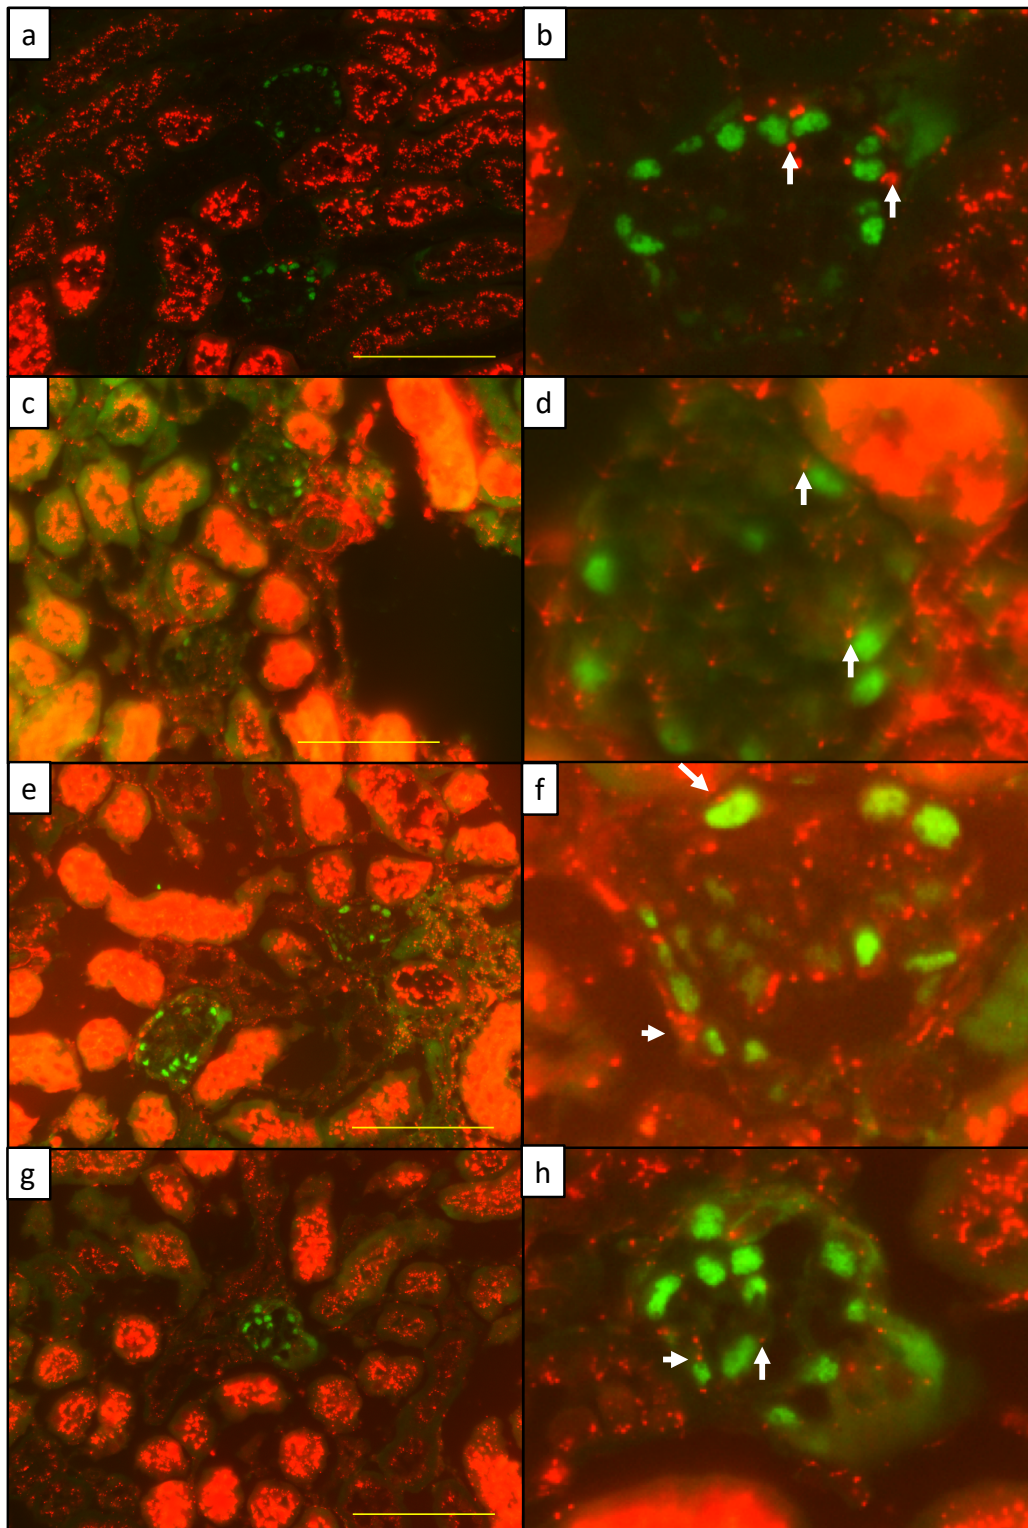

**Supplementary Fig. 5 | ASO-ENA injection into healthy mice.** Green: WT1 protein. Red: ASO-ENA tagged by Cyanine 3. The uptake of ASO-ENA by podocytes (arrows) and tubular epithelial cells (arrow heads) is clearly observed in every specimen. **a, b,** Wild-type mouse sacrificed 24 hours after administration. **b, c,** Mutant mouse sacrificed 24 hours after administration. **e, f,** Wild-type mouse sacrificed two weeks after administration. **g, h,** Mutant mouse sacrificed two weeks after administration. Scale bars are 100  $\mu\text{m}$ . Staining was conducted twice and both yielded the same staining pattern.
